# Supplementary material
Source: MDPI journal article supplement (https://www.mdpi.com/1999-4907/13/5/739)
Supplement: s1 [file s1]

**Table S1.** The study site basic informations of the three coniferous forest ecosystems in the semi-arid area of Northwest China.

| Forest types                           | <i>Larix principis-rupprechtii</i>                                                                                                                                                                                                         | <i>Pinus tabulaeformis</i>                                                                                                                                                                                                           |
|----------------------------------------|--------------------------------------------------------------------------------------------------------------------------------------------------------------------------------------------------------------------------------------------|--------------------------------------------------------------------------------------------------------------------------------------------------------------------------------------------------------------------------------------|
| <b>Site informations</b>               |                                                                                                                                                                                                                                            |                                                                                                                                                                                                                                      |
| Coordinates                            | N: 35°44'16.19", E: 104°1'2.87"                                                                                                                                                                                                            | N: 36°5'20.57", E: 108°21'30.78"                                                                                                                                                                                                     |
| Elevation (m a.s.l)                    | 2804.4                                                                                                                                                                                                                                     | 1576.2                                                                                                                                                                                                                               |
| <b>Climatic factors</b> <sup>[1]</sup> |                                                                                                                                                                                                                                            |                                                                                                                                                                                                                                      |
| Annual precipitation (mm)              | 450-622                                                                                                                                                                                                                                    | 560-620                                                                                                                                                                                                                              |
| Average annual temperature (°C)        | 7.3                                                                                                                                                                                                                                        | 9.4                                                                                                                                                                                                                                  |
| Annual potential evaporation (mm)      | 1096-1520                                                                                                                                                                                                                                  | 1105-1625                                                                                                                                                                                                                            |
| Average relative humidity (%)          | 62.34                                                                                                                                                                                                                                      | 59.89                                                                                                                                                                                                                                |
| Annual average sunlight (h)            | 2569.4                                                                                                                                                                                                                                     | 2461.5                                                                                                                                                                                                                               |
| <b>Vegetation information</b>          |                                                                                                                                                                                                                                            |                                                                                                                                                                                                                                      |
| Stand density                          | 2048/hm <sup>2</sup>                                                                                                                                                                                                                       | 2528/hm <sup>2</sup>                                                                                                                                                                                                                 |
| Canopy height (m)                      | 15                                                                                                                                                                                                                                         | 10                                                                                                                                                                                                                                   |
| Average DBH (cm)                       | 17.85                                                                                                                                                                                                                                      | 14.00                                                                                                                                                                                                                                |
| Understory vegetation coverage (%)     | 40                                                                                                                                                                                                                                         | 95                                                                                                                                                                                                                                   |
| Litter thickness (cm)                  | 12                                                                                                                                                                                                                                         | 10                                                                                                                                                                                                                                   |
| Leaf area index (LAI)                  | 3.49                                                                                                                                                                                                                                       | 3.29                                                                                                                                                                                                                                 |
| Understory dominant vegetation         | <i>Rosa sweginzowii</i> , <i>Rosa omeiensis</i> , <i>Cotoneaster multiflorus</i> ,<br><i>Lonicera hispida</i> , <i>Carex rigescens</i> , <i>Aconitum sinomontanum</i> ,<br><i>Fragaria orientalis</i> , <i>Potentilla bifurca</i> , et al. | <i>Berberis kansuensis</i> , <i>Eleutherococcus giraldii</i> , <i>Cotoneaster multiflorus</i> , <i>Cerasus tomentosa</i> , <i>Smilax stans</i> , <i>Carex duriuscula</i> subsp. <i>Rigescens</i> , <i>Medicago lupulina</i> , et al. |

Note: <sup>[1]</sup> The climate factor data is obtained from the website of the national greenhouse data sharing platform in the past 20 years (<http://data.sheshiyuanyi.com/WeatherData/>).

**Table S2.** The detailed information about the instruments and installations of the three study sites.

| Variables                                                                       | Sensors                         | <i>Larix principis-rupprechtii</i> | <i>Pinus tabulaeformis</i> |
|---------------------------------------------------------------------------------|---------------------------------|------------------------------------|----------------------------|
| Flux tower height                                                               | —                               | 24 m                               | 25 m                       |
| Installation time of flux tower                                                 | —                               | April, 2018                        | November, 2019             |
| Eddy covariance system                                                          | Li7500 DS, LI-COR, USA          | 18 m                               | 13 m                       |
| Air temperature ( $TA$ , °C)                                                    | HMP155A, Vaisala, USA           | 4, 8, 12, 16, 18, 24 m             | 2, 6, 12, 16, 24 m         |
| Air humidity ( $RH$ , %)                                                        | HMP155A, Vaisala, USA           | 4, 8, 12, 16, 18, 24 m             | 2, 6, 12, 16, 24 m         |
| Four-component radiation ( $W \cdot m^{-2}$ )                                   | CNR4, Kipp & Zonen, Netherlands | 16 m                               | 20 m                       |
| Photosynthetic active radiation ( $PAR$ , $\mu mol \cdot m^{-2} \cdot s^{-1}$ ) | LI-190R, LI-COR, USA            | 2, 8, 16 m                         | 4, 20 m                    |
| Soil temperature ( $TS$ , °C)                                                   | GS3, Decagon, USA               | 10, 20, 40, 60 cm                  | 10, 20, 40, 60, 80 cm      |
| Soil water content ( $SWC$ , %)                                                 | GS3, Decagon, USA               | 10, 20, 40, 60 cm                  | 10, 20, 40, 60, 80 cm      |
| Precipitation ( $P$ , mm)                                                       | RM Young, 52202, USA            | 16 m                               | 16 m                       |
| Wind speed ( $WS$ , $m \cdot s^{-1}$ )                                          | DS-2, Decagon, USA              | 8, 12, 16, 24 m                    | 2, 6, 12, 16, 24 m         |
| Wind direction ( $WD$ , °)                                                      | DS-2, Decagon, USA              | 8, 12, 16, 24 m                    | 2, 6, 12, 16, 24 m         |
| Air pressure ( $Pa$ , Pa)                                                       | CS106, Vaisala, USA             | 1 m                                | 1 m                        |
